# Supplementary material
Source: publisher figshare collection journal article supplement (https://rs.figshare.com/ndownloader/files/20846598)
Supplement: Supplementary file 1 [file 20846598]

**Supplementary Materials**

Whole Model Test

| **Model** | **-Log Likelihood** | **L-R Chi Square** | **DF** | **Prob > ChiSq** |
| --- | --- | --- | --- | --- |
| Difference | 58.9521 | 117.9042 | 7 | < 0.0001 |
| Full | 122.9975 |  |  |  |
| Reduced | 181.9597 |  |  |  |

Supplementary Table 1

P-value considered significant if p < 0.025. Bold denotes significance based on adjusting for multiple comparisons (parasite treatment and host genotype) via Bonferroni corrections.

Results of contrast tests when combining the results of both host genotypes:

| **Combined Mortality Assays Results of Both Hosts** | Evolved on 100% CB4856 🡪  Tested on CB4856  AND  Evolved on 100% ewIR 68 🡪  Tested on ewIR 68 | Evolved on 75-25, 50-50, & 25-75 🡪  Tested on CB4856  AND  Tested on ewIR 68 | Evolved i*n vitro*  (no hosts) 🡪  Tested on CB4856 AND ewIR 68 |
| --- | --- | --- | --- |
| Evolved on 100% CB4856 🡪  Tested on ewIR 68  AND  Evolved on 100% ewIR 68 🡪  Tested on CB4856 | **p = 0.0140**  **X2 = 6.0411**  *see Figure 2 | **p = 0.0033**  **X2 = 8.6581** | **p = 0.0033**  **X2 = 8.6414** |
| Evolved on 100% CB4856 🡪  Tested on CB4856  AND  Evolved on 100% ewIR 68 🡪  Tested on ewIR 68 |  | **p < 0.0001**  **X2 = 56.5959** | **p < 0.0001**  **X2 = 18.3751** |
| Evolved on 75-25, 50-50, & 25-75 🡪  Tested on CB4856  AND  Tested on ewIR 68 |  |  | p = 0.9652  X2 = 0.0019 |

Supplementary Table 2

P-value considered significant if p < 0.025. Bold denotes significance based on adjusting for multiple comparisons (parasite treatment and host genotype) via Bonferroni corrections.

Results of contrast tests with CB4856 hosts:

| **Mortality Assays on Host CB4856** | Evolved on 100% CB4856 🡪  Tested on CB4856 | Evolved on 75%, 50%, and 25% CB4856 🡪  Tested on CB4856 | Evolved i*n vitro*  (no hosts) 🡪 Tested on CB4856 |
| --- | --- | --- | --- |
| Evolved on 100% ewIR 68 🡪  Tested on CB4856 | **p < 0.0001**  **X2 = 21.2979** | **p = 0.0038**  **X2 = 8.3541** | p = 0.0939  X2 = 2.8058 |
| Evolved on 100% CB4856 🡪  Tested on CB4856 |  | **p < 0.0001**  **X2 = 52.9894** | **p < 0.0001**  **X2 = 29.1317** |
| Evolved on 75%, 50%, and 25% CB4856 🡪  Tested on CB4856 |  |  | p = 0.9617  X2 = 0.0023 |

Supplementary Table 3

P-value considered significant if p < 0.025. Bold denotes significance based on adjusting for multiple comparisons (parasite treatment and host genotype) via Bonferroni corrections.

Results of contrast tests with ewIR 68 hosts:

| **Mortality Assays on Host ewIR 68** | Evolved on 100% ewIR 68 🡪  Tested on ewIR 68 | Evolved on 75%, 50%, and 25% ewIR 68 🡪  Tested on ewIR 68 | Evolved i*n vitro*  (no hosts) 🡪 Tested on ewIR 68 |
| --- | --- | --- | --- |
| Evolved on 100% CB4856 🡪  Tested on ewIR 68 | p = 0.2648  X2 = 1.2436 | **p < 0.0001**  **X2 = 57.8026** | **p < 0.0001**  **X2 = 31.3571** |
| Evolved on 100% ewIR 68 🡪  Tested on ewIR 68 |  | **p < 0.0001**  **X2 = 18.3747** | **p = 0.0001**  **X2 = 14.6801** |
| Evolved on 75%, 50%, and 25% ewIR 68🡪  Tested on ewIR 68 |  |  | p = 0.9968  X2 = 0.00002 |

***C. elegans* and *S. marcescens* strains**

*C. elegans* strain ewIR 68 was acquired from Jan Kammenga (Wageningen University, 2017). Both *E. coli* OP50 and *C. elegans* CB4856 were acquired from the Caenorhabditis Genome Center (CGC) (University of Minnesota, 2010), and *S. marcescens* Sm2170 was acquired from Sue Katz (Rogers State University, 2006). All strains were frozen at -80ºC and thawed for each new experiment.

**Experimental Evolution: supplemental methods**

For the initial passage of the experiment, we streaked Sm2170 (stored at -80ºC frozen in glycerol) onto an NGM-Lite (US Biological, Salem, MA) plate using an inoculation loop. After 48 hours of growth at room temperature (RT), we inoculated one Sm2170 colony into 5 mL lysogeny broth (LB) in a lidded test tube and grown overnight in a 28ºC shaker incubator. We performed the same series of steps for *E. coli* OP50, the primary food source of *C. elegans*. After 24 hours of growth in 28ºC LB, we pipetted 35 μL of Sm2170 from the LB tube and spread on a NGM-Lite 10 cm petri dish on 1/3 of a plate, and we spread 35 μL of OP50 onto another 1/3 of a plate (figure S1, step 1). The two bacterial lawns were separated by a strip of bare agar. These plates are hereafter referred to as *Serratia* selection plates (SSPs).

Once all plates were seeded with both bacteria, they were put in 28ºC to grow bacterial lawns overnight. The following day, approximately 1,000 larval stage 4 (L4) worms of differing mixtures of two *C. elegans* host genotypes were placed directly onto the lawn of *S. marcescens* Sm2170 on the SSPs (figure S1, step 1). Each passage, we obtained synchronized populations of eggs using bleach and sodium hydroxide, which then developed into the L4 stage in around 44 hours. Thus, we made sure to synchronize the worms two days before plating them and performed these assays at the same time as inoculating LB with each treatment bacteria.

The host genotype mixture treatments included the following: worms 1,000 CB4856 worms (100-0) (in other words, 100% CB4856 and no (0%) ewIR 68), 750 CB4856 worms plus 250 ewIR 68 worms (75-25), 500 CB4856 worms plus 500 ewIR 68 worms (50-50), 250 CB4856 worms plus 750 ewIR 68 worms (25-75), 1,000 ewIR 68 worms (0-100), and no worms as a 0-0 control (figure S2). Each treatment included six replicate populations for a total of 36 treatment populations. After 24 hours, 30 dead worms were picked from the Sm2170 side of the plate into a 1.5 mL microcentrifuge tube filled with 1 mL of M9 buffer (figure S1, step 2). Since many worms are still alive at the 24-hour time point, selecting for those killed early on likely selects for the most virulent parasites in the population. In the no-worm control (0-0) populations, the Sm2170 lawn was dabbed randomly 30 times by an inoculation loop and the selected bacteria were placed in a microcentrifuge tube with 1 mL of M9. All microcentrifuge tubes with dead worms were washed 6 times to rid any external bacteria. They were first spun at 3,000 rpm for 1 minute, supernatant was then pipetted off, and 900 μl of new M9 was added to the tube (figure S1, step 3). Once washed, the internal bacteria were released from the worm bodies by using a cordless tissue grinder with autoclavable pellet mixers for 30 seconds (figure S1, step 4). This was repeated for all 36 microcentrifuge tubes, including the 6 populations without worms (0-0).

Once homogenized, bacteria and worm bodies were streaked onto an NGM-Lite plate, then colonies of surviving bacteria were allowed to grow at room temperature for 48 hours and were stored at 4ºC until further use (figure S1, step 5). OP50 colonies were also stored at 4ºC for use in subsequent passages and did not evolve in the course of this experiment. For the next passage, 40 Sm2170 colonies that had grown up on the plates stored in 4ºC were then used to inoculate a 5 mL vial of LB, then grown overnight at 28ºC, and used to inoculate the next round of SSPs (figure S1, step 6-8). Each passage took approximately 1 week, and the entire process was repeated 10 times for a total of 10 weeks. After each passage of evolution, a subset of the evolved bacteria was frozen with glycerol and stored in -80ºC, and the other subset was used to seed the next round of SSPs. After ten passages of experimental evolution, we had a chronological record of each generation’s frozen bacteria. The experiment concluded at the end of 10 passages.

**Mortality Assays: supplemental methods**

For the mortality assays, we used bacteria frozen after passage 10 to compare with the ancestral bacteria. The steps outlined in the creation of the SSPs were identical to that of the mortality assay. Two-hundred worms of the same genotype were placed on a mortality assay plate (figure S2, step 1). To calculate an average volume of 200 worms, a plate of healthy L4 worms was washed with M9 into a 1.5 microcentrifuge tube, 10 μl of the volume was pipetted into 3 glass wells, and the average number of worms per 10 μl was calculated to determine the volume for an average of 200 worms. We then pipetted that volume onto 3 unseeded plates each and averaged the number plated.

After 48 hours at 20ºC, the number of dead worms on each plate were counted (figure S2, step 2). Mortality rates were calculated as the proportion of dead hosts on the treatment plates out of the averaged number plated on the unseeded plates. As stated previously, each treatment had a total of 6 replicate populations that were evolving against a particular mix of hosts. To determine whether the parasites evolved greater virulence over the course of the experiment, the evolved parasites were compared to the ancestral parasites in their ability to cause host mortality. Thus, both host strains were infected with the ancestral parasite in order to have a base mortality rate to compare with the evolved mortality rate at the end of ten passages. When performing mortality assays, we had 6 treatments x 6 population replicates x 6 (or 3) technical replicates = 360 total plates (figure S2, step 3). In other words, ¼ of the assays had 3 technical replicates per population and ¾ of the assays had 6 technical replicates per population. To control for variation in mortality assays, ancestral assays were performed alongside treatment assays in addition to those performed at the outset of the evolution experiment.

To calculate choice indices, we plugged in mortality rates to this equation:

evolved mortality – ancestral mortality)/ancestral mortality = rate of change

Thus, a +1 on the y-axis corresponds with a 2-fold increase in mortality (relative to the ancestor), and a -1 corresponds with a 2-fold decrease in mortality. The dashed line at 0 represents no change in mortality (aka, the ancestor) (figures 1-2, S3).

**Supplementary Figure 1.**


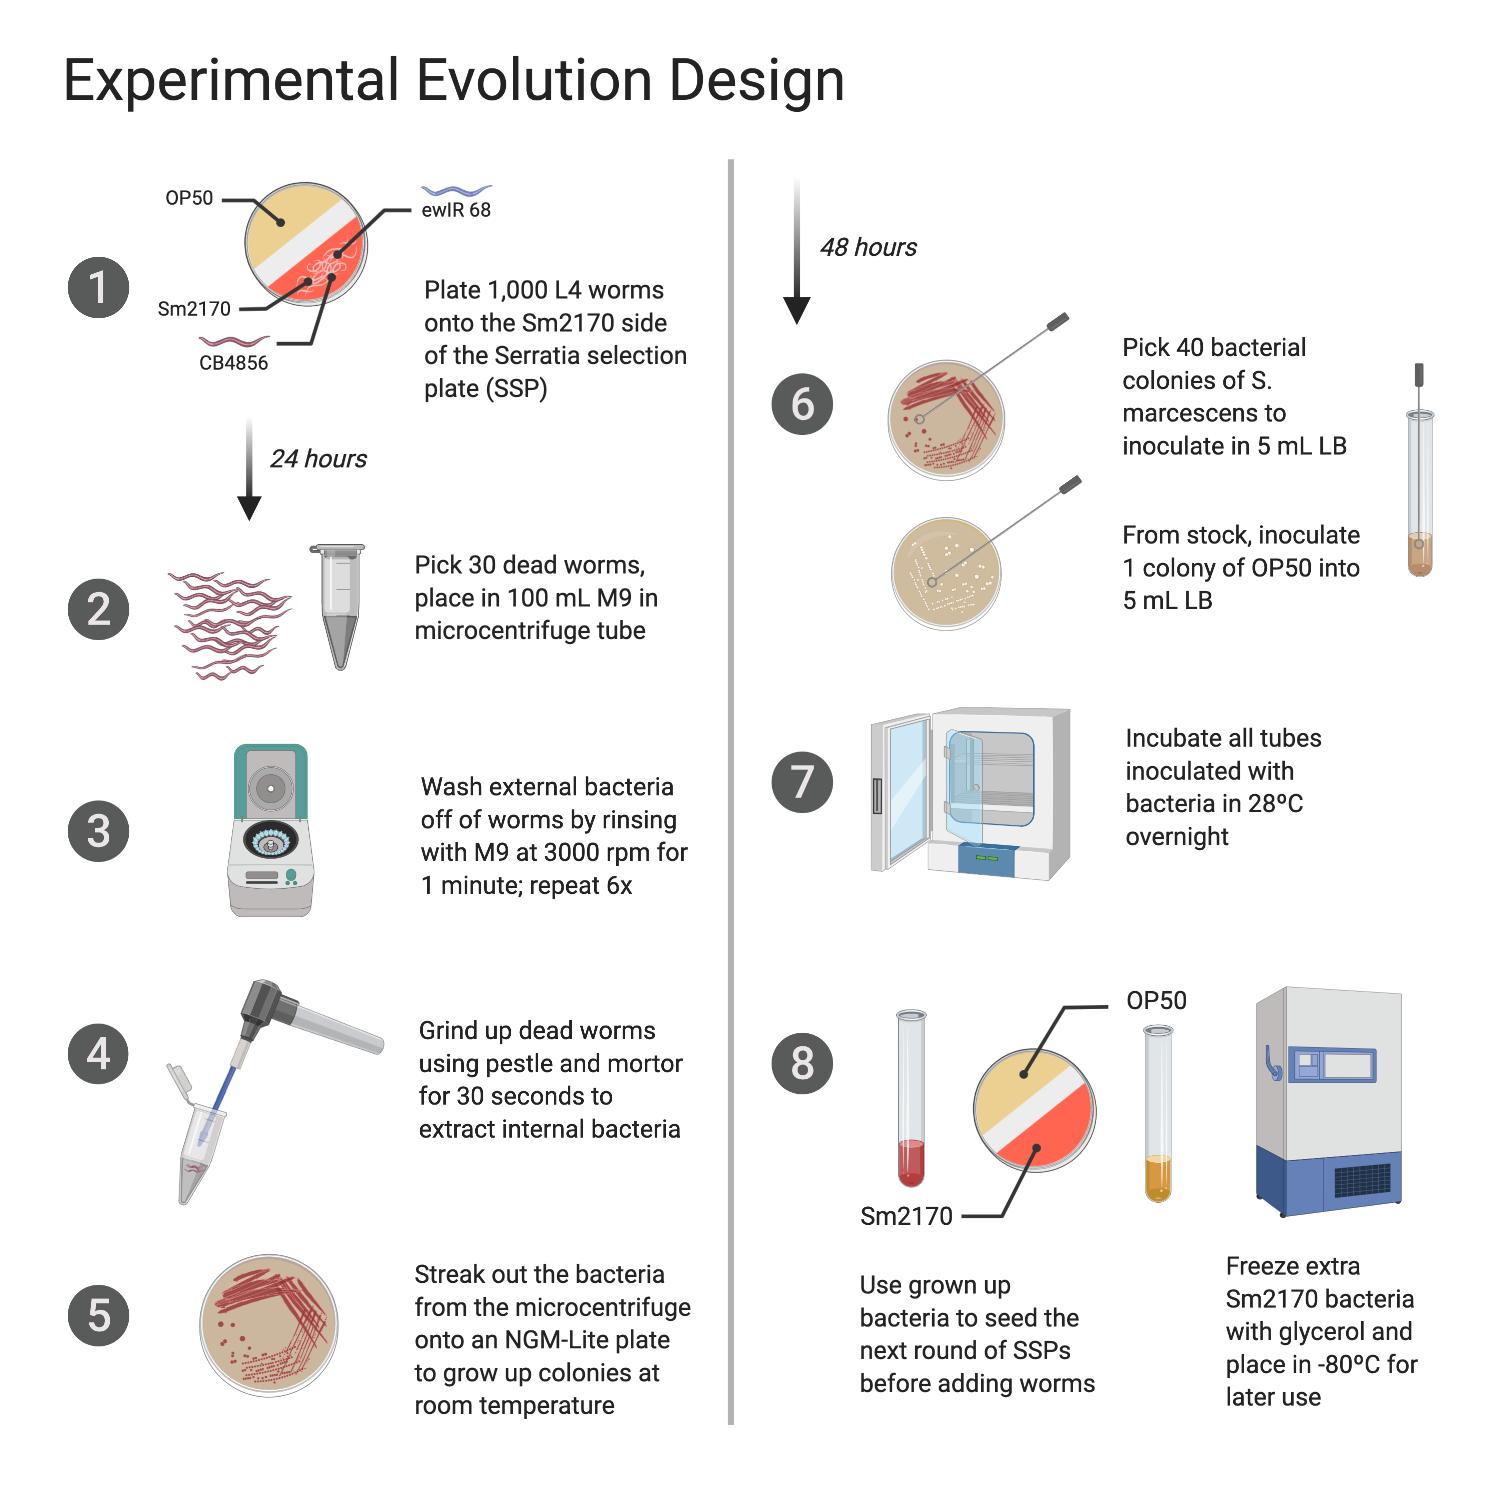


**Supplementary Figure 2.**


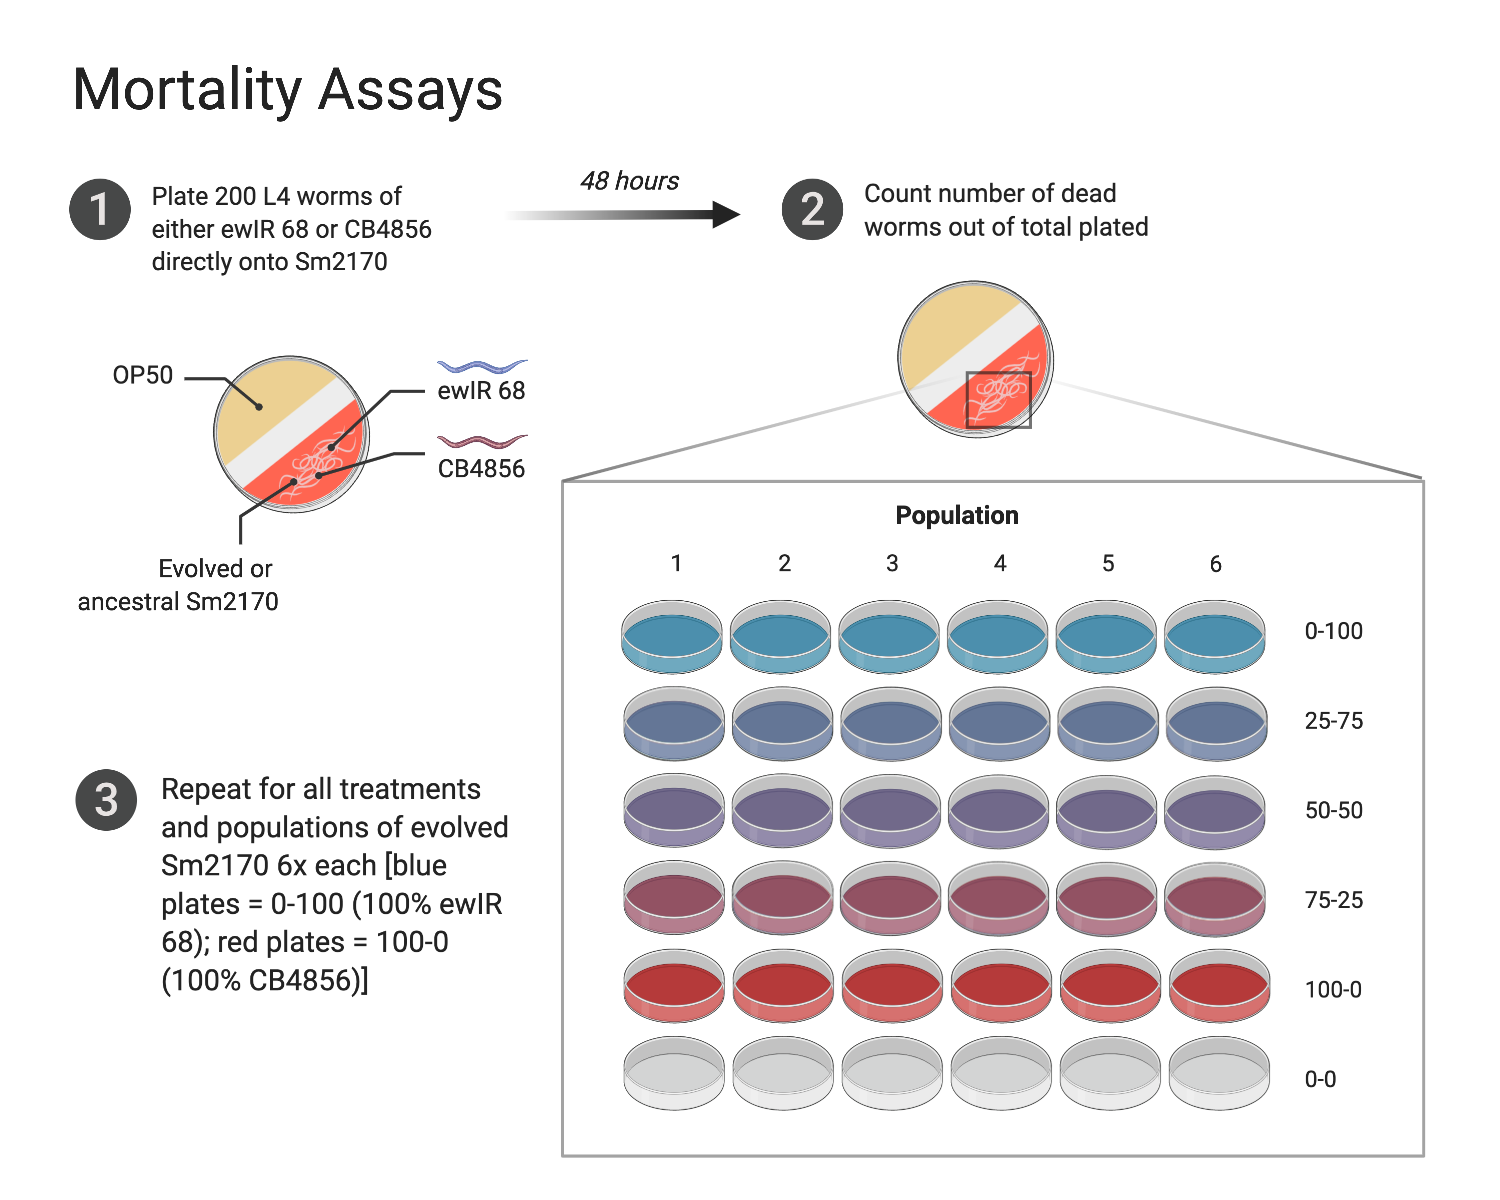


**Supplementary Figure 3.**

**Figure S3.** Absolute mortality rates of each host strain. The dashed lines correspond with the ancestral mortality rates performed in conjunction with the evolved mortality rates for each separate assay.
